# Supplementary material for: ETV4 promotes late development of prostatic intraepithelial neoplasia and cell proliferation through direct and p53-mediated downregulation of p21
Source: Springer Nature journal article supplement (doi:10.1186/s13045-020-00943-w), 2020-08-13
Supplement: MOESM1 [file 18279302]

## **Supplementary tables and figures**

### **Title:**

ETV4 promotes late development of prostatic intraepithelial neoplasia and cell proliferation through direct and p53-mediated downregulation of p21

### **Authors**

Irene Cosi<sup>1\*</sup>, Annamaria Pellecchia<sup>1\*</sup>, Emanuele De Lorenzo<sup>1\*</sup>, Eugenio Torre<sup>2</sup>, Michela Sica<sup>1</sup>, Gabriella Nesi<sup>3</sup>, Rosario Notaro<sup>1</sup>, Maria De Angioletti<sup>1,4</sup>.

**Supplementary Table 1: Sequences of primers and oligonucleotides.**

| Region                         | Procedure  | Forward primer sequence                             | Reverse primer sequence                                |
|--------------------------------|------------|-----------------------------------------------------|--------------------------------------------------------|
| human ETV4                     | genotyping | 5'-CTGGACATTTGCCACTCCTT-3'                          | 5'-AAAGCTCTGCTGGGGATAGG-3'                             |
| murine beta-actin              | genotyping | 5'- ACCACAGCTGAGAGGGAAATC -3                        | 5'- AGAGGTCTTTACGGATGTCAA -3                           |
| human GAPDH                    | qRT-PCR    | 5'- AACGGATTTGGTCGTATTGGGC-3'                       | 5'- TTGATTTTGGAGGGATCTCG -3'                           |
| murine gapdh                   | qRT-PCR    | 5'- TGACCACAGTCCATGCCATC-3'                         | 5'- GACGGACACATTGGGGGTAG -3'                           |
| * human and murine ETV4        | qRT-PCR    | 5'-ACCACCAGGATCAAGAAGGA-3'                          | 5'-GGCACTGGAGTAAAGGCACT-3'                             |
| human ETV4                     | qRT-PCR    | 5'-CCACCAGGATCAAGAAGGAG-3'                          | 5'-CTCAGGAAATTCCGTTGCTC-3'                             |
| murine etv4                    | qRT-PCR    | 5'-GGCAGAACAGCAGCAGAGC-3'                           | 5'-CCTCCCTGAGGAGATGTGAA-3'                             |
| murine cdkn1a                  | qRT-PCR    | 5'-GCAGATCCACAGCGATATCC-3'                          | 5'-CAACTGCTCACTGTCCACGG-3'                             |
| murine cdkn1b                  | qRT-PCR    | 5'-AAGGGCCAACAGAACAGAAG-3'                          | 5'-GGATGTCCATTCAATGGAGTC-3'                            |
| murine tp53                    | qRT-PCR    | 5'-AACCGCCGACCTATCCTTAC-3'                          | 5'-CTTCTGTACGGCGGTCTCTC-3'                             |
| human CDKN1A                   | qRT-PCR    | 5'-CTAGGCGGTTGAATGAGAGG-3'                          | 5'-GCCAGGGTATGTACATGAGGA-3'                            |
| human CDKN1B                   | qRT-PCR    | 5'-AATAAGGAAGCGACCTGCAA-3'                          | 5'-TTCTGAGGCCAGGCTTCTT-3'                              |
| human TP53                     | qRT-PCR    | 5'-AACCGCCGACCTATCCTTAC-3'                          | 5'-CTTCTGTACGGCGGTCTCTC-3'                             |
| murine mmp2                    | qRT-PCR    | 5'-CAAGTTCCCCGGCGATGTC-3'                           | 5'-TTCTGGTCAAGGTCACCTGTC-3'                            |
| murine mmp7                    | qRT-PCR    | 5'-GGGGACTGCGGATATCATAA-3'                          | 5'-AAAGTGAGCATCTCCGCCTA-3'                             |
| murine mmp9                    | qRT-PCR    | 5'-GTGGTTCAGTTGTGGTGGTG-3'                          | 5'-CCCGCTGTATAGCTACCTCG-3'                             |
| human COX2                     | ChIP       | 5'-TCCCTCCTCTCCCCTTAAAA-3'                          | 5'-AGTGGGGACTACCCCTCTG-3'                              |
| human CDKN1A promoter (site A) | ChIP       | 5'-TTCCCTGGAGATCAGGTTGC-3'                          | 5'-TGAGGAAATTGAGGTCCACTG-3'                            |
| human CDKN1A promoter (site B) | ChIP       | 5'-CCCCACAGCAGAGGAGAAAG-3'                          | 5'-TGCAGAGGATGGATTGTTCA-3'                             |
| human CDKN1A promoter (site C) | ChIP       | 5'-CTGTGGCTCTGATTGGCTTT-3'                          | 5'-CTCCTACCATCCCCTTCTC-3'                              |
| human G6PD                     | ChIP       | 5'- AGGCCGTGTACACCAAGATGA-3'                        | 5'- CGTAGGCGTCAGGGAGCTT-3'                             |
| ETV4-BS (A)-Luc                | Cloning    | 5'-ata <b>CTCGAG</b> CTGCAACCACAGGGATTTCT-3' (XhoI) | 5'-acg <b>AAGCTT</b> CCACAAGGAAGTACTTTCG-3' (Hind III) |
| ETV4-BS (A+B)-Luc              | Cloning    | 5'-CTGTCCTCTG <b>CTCGAG</b> ATTTGACAAC-3 (XhoI)     | 5'-CCACA <b>AAGCTT</b> CTGACTTCGGCAG-3'(Hind III)      |
| shETV4A                        | Silencing  | 5'-GGCGCTTCCCAACTTCATA-3'                           |                                                        |
| shETV4B                        | Silencing  | 5'-CCCTGTGTACATATAAATGAA-3'                         |                                                        |
| irrelevant shRNA               | Silencing  | 5'-GCCTATTTACGCCTGACAA-3'                           |                                                        |
| siRNA ETV4                     | Silencing  | ONTARGETplus SMARTpool ref# SO-2582781G             |                                                        |
| irrelevant siRNA               | Silencing  | ONTARGETplus Non-targeting Pool ref# D-001810       |                                                        |
| shETV1                         | Silencing  | 5'-TTGTGTTTCATACACTGGGTGCG-3'                       |                                                        |

The procedures in which the primers have been used are reported. \* To quantify ETV4 expression in murine prostate we selected primers that recognize ETV4 sequences identical in mouse and human. To improve cloning efficiency, the respective primers include sequences (in **bold**) of sites for restriction enzyme indicated in parenthesis.

**Supplementary Table 2. Primary antibodies used in this study.**

| <b>Antigen</b> | <b>clone</b>  | <b>Procedure</b> | <b>Producer</b>                           | <b>Catalog number</b> |
|----------------|---------------|------------------|-------------------------------------------|-----------------------|
| β-actin        | AC-15         | WB               | Sigma-Aldrich, St Louis, MO, USA          | A1978                 |
| ETV4           | 3G9-1B9       | WB               | Abnova, Atlanta, GA, USA                  | H00002118-M01         |
| ETV4           | polyclonal    | IHC              | Life Span Bioscience, Seattle, WA, USA    | LS-B1527              |
| Ki67           | B56           | IHC              | Pharmigen, San Diego, CA, USA             | 550609                |
| p63            | 4A4           | IHC              | NeoMarkers, Fremont, CA, USA              | M1081-P1              |
| p21 Waf1/Cip1  | C19           | WB               | SantaCruz Biotechnologies, Dallas TX, USA | sc397G                |
| p21 Waf1/Cip1  | 2F1           | IHC/WB in mice   | Abnova                                    | H00001026-M02         |
| p27 Kip1       | polyclonal    | WB; IHC          | Cell signalling; Boston, MA, USA          | 2552                  |
| p53            | DO-1          | WB               | Santa Cruz Biotechnologies                | SC-126                |
| PCNA           | poyclonal     | IHC              | Abcam, Cambridge, UK                      | ab15497               |
| BrdU           | BU1/75 (ICR1) | IHC              | Abcam                                     | ab8326                |

The procedures in which the antibodies have been used are reported.

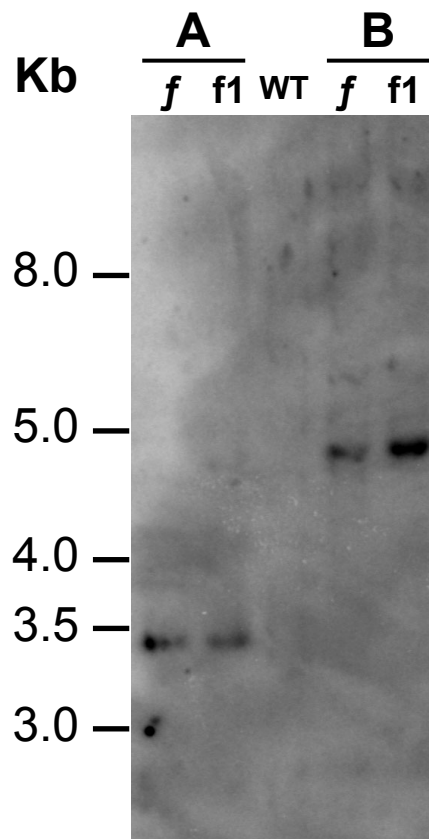

**Supplementary Figure 1. Southern blot analysis of transgene insertion in ETV4 mouse lines.**

Copy number assessed by Southern blot analysis on DNA from mice belonging to line **A** and line **B**. DNA has been digested by *Xba*I, which recognizes only one site in the PB-ETV4 construct, and probed with the construct. *Xba*I should generate a band larger than 3.0 Kb (the length of the construct) for each different integration site. *f*= founder; *f1*= F1 progeny; WT= wild-type.

a

WT

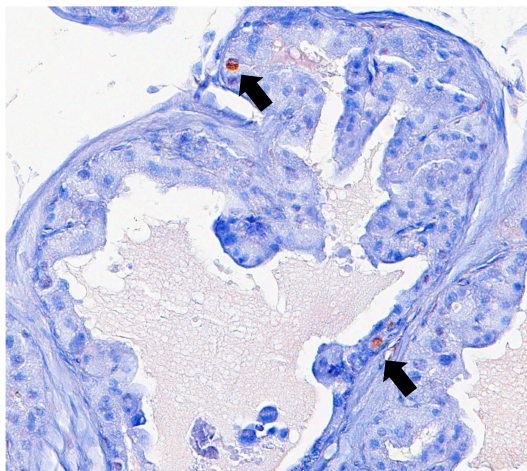

b

ETV4

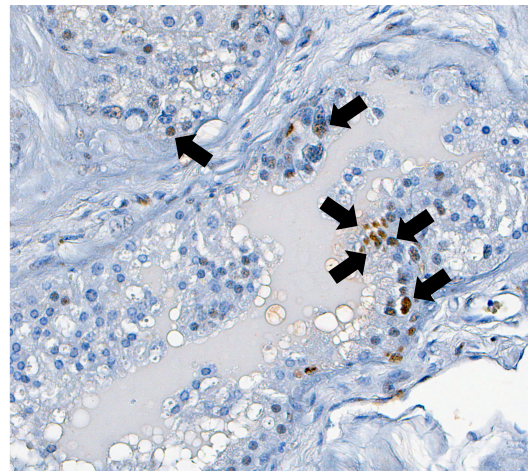

c

WT

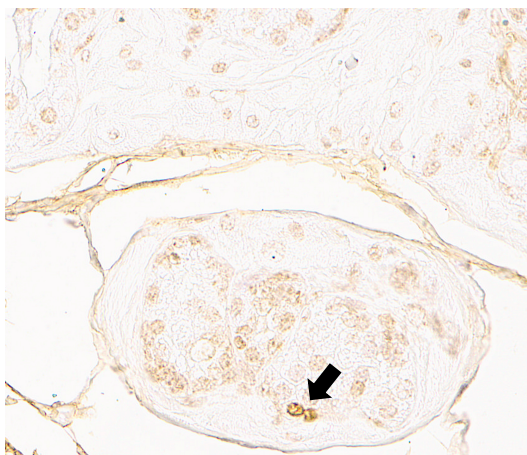

d

ETV4

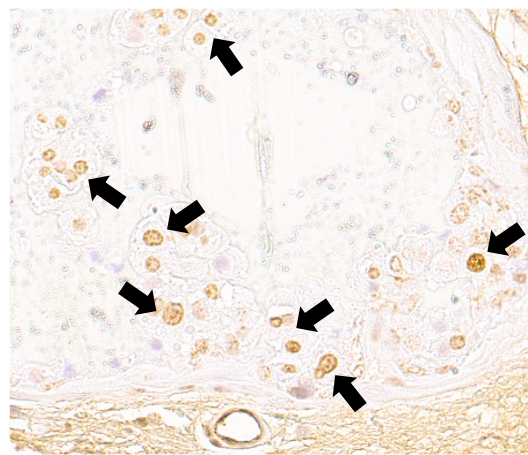

### Supplementary Figure 2. Analysis of prostate cell proliferation in mice.

*Proliferating cell nuclear antigen (PCNA) staining of mouse prostate cells.* Cell proliferation analysis by PCNA staining in the anterior prostate of 5 month-old wild-type (a) and ETV4 mice (b). Arrows indicate proliferating cells.

*Bromodeoxyuridine (BrdU) incorporation in mouse prostate cells.* Cell proliferation analysis by BrdU incorporation in the anterior prostate of 5 month-old wild-type (c) and ETV4 mice (d). Arrows indicate proliferating cells.

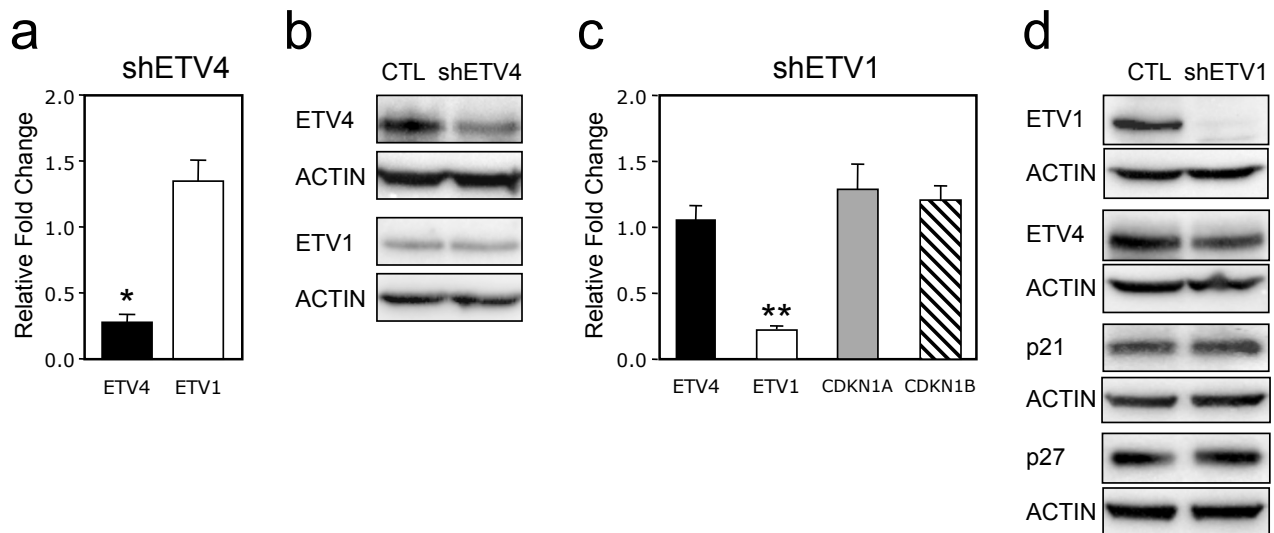

### Supplementary Figure 3. ETV1 expression in PC3 cells.

PC3 cells co-express ETV4 and ETV1 (Mesquita *et al.*, *Oncotarget* 2015; 6:5217-36). This co-expression could potentially affect our results. We have investigated the effects of ETV4 silencing on ETV1 expression and the effect of ETV1 silencing on the expression of ETV4, CDKN1A and CDKN1B. These data suggest that the low basal expression of ETV1 in PC3 (about 5%-10% of ETV4 levels: Mesquita *et al.*, *Oncotarget* 2015 and our data) does not interfere with our experimental model. In any event, all our observations have been validated in the mirror model, *i.e.* the RWPE cells transfected with an ETV4-expressing vector.

(a) qRT-PCR of PC3 cells transduced with either an anti-ETV4 shRNA (shETV4) or with an irrelevant shRNA has shown that ETV4 silencing results in a non-significant variation of ETV1 expression. Data represent average and standard error values from 3 independent experiments in triplicate. \* $P \leq 0.05$ .

(b) Western blots of PC3 cells transduced with either an anti-ETV4 shRNA or with an irrelevant shRNA (CTL) have shown that ETV4 silencing results in a non-significant variation of ETV1 expression. Representative blots of 3 independent experiments.

(c) qRT-PCR of PC3 cells transduced with either an anti-ETV1 shRNA (shETV1) or with an irrelevant shRNA (CTL) has shown that ETV1 silencing results in a non-significant variation of *ETV4*, *CDKN1A* and *CDKN1B* expression. Data represent average and standard error values from 3 independent experiments in triplicate. \*\* $P \leq 0.01$ .

(d) Western blots of PC3 cells transduced with either an anti-ETV1 shRNA (shETV1) or with an irrelevant shRNA (CTL) have shown that ETV1 silencing results in a non-significant variation of ETV4, p21 and p27 expression. Representative blots of 3 independent experiments.

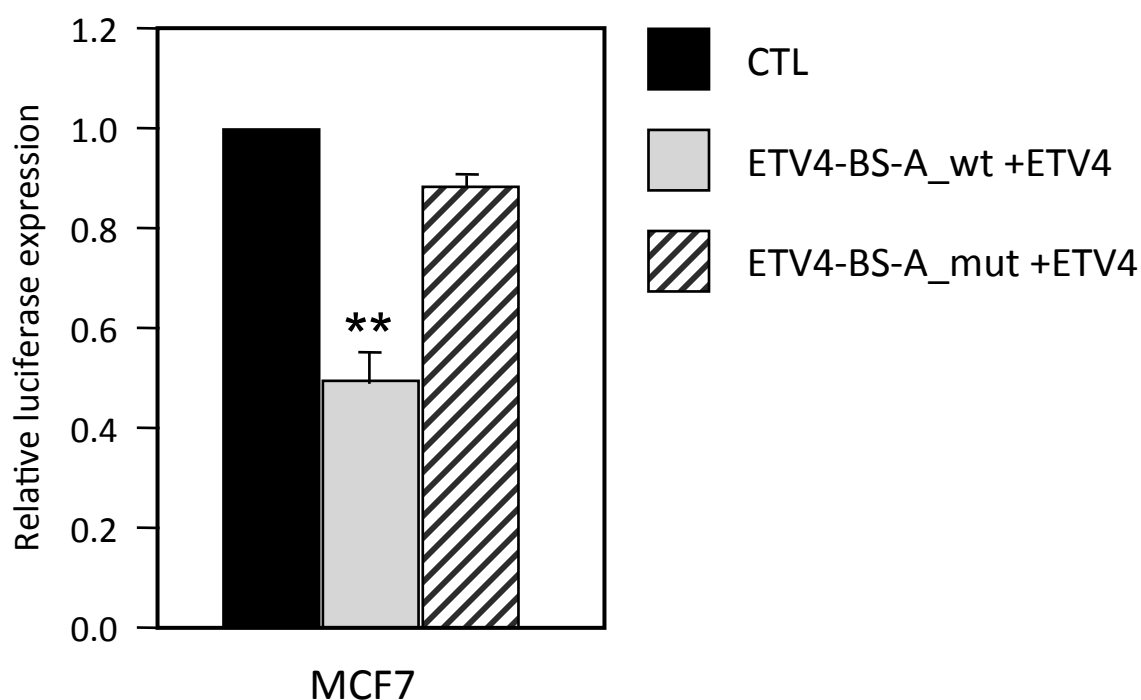

**Supplementary Figure 4. ETV4 binds and downregulates the *CDKN1A* promoter also in MCF7 breast cancer cell line.**

Quantification of dual luciferase reporter assay in MCF7 breast cancer cell line transiently transfected with vectors in which firefly luciferase expression is driven by the 865 bp *CDKN1A* promoter fragment (Fig. 5b) containing either the wild-type (ETV4-BS-A\_wt) or the mutant (ETV4-BS-A\_mut) ETV4 BS-A. The bar diagram shows the relative luciferase activity (Firefly/Renilla ratio) from cells transfected with an ETV4-expressing vector (+ETV4, grey and dashed bars) normalized to those transfected with an empty vector (CTL, black bar). Data represent average and standard error of triplicate measurements of at least 3 independent experiments. \*\*  $P \leq 0.01$ .
